# Supplementary material
Source: PubMed Central journal article supplement (PMC5326604)
Supplement: NIHMS796669-supplement-supplement_1.pdf [file NIHMS796669-supplement-supplement_1.pdf]

Appendix: Supplemental Tables

Table S1: Percentage Who Report Vaping Specific Substances At Last Use, by E-Cigarette Frequency and Grade (Standard Error in Parentheses)

|                         | ----- Used E-cigarette in Past 30 Days ----- |              |                           |
|-------------------------|----------------------------------------------|--------------|---------------------------|
|                         | Any Use                                      | 1-5 Times    | 6+ Times                  |
| <b>Grade 12</b>         |                                              |              |                           |
| Unweighted n            | n=537                                        | n=339        | n=198                     |
| % of grade,<br>weighted | 13.40 (.88)                                  | 8.44 (.58)   | 4.96 (.59)                |
| Just Flavoring          | 57.65 (2.46)                                 | 64.53 (2.88) | 45.92 (3.92) <sup>c</sup> |
| Nicotine                | 32.84 (2.42)                                 | 23.83 (2.85) | 48.18 (3.95) <sup>c</sup> |
| Marijuana               | 5.17 (1.13)                                  | 5.95 (1.71)  | 3.84 (1.55)               |
| Don't Know              | 3.98 (.91)                                   | 5.48 (1.27)  | 1.42 (.95)                |
| Other                   | 0.37 (.20)                                   | 0.21 (.17)   | 0.64 (.46)                |

<sup>c</sup> Significantly different from group that vaped 1-5 times in past 30 days, p<.05

Note: Questions on e-cigarette use and vaporizer use are asked on the same questionnaire only in 12<sup>th</sup> grade, and e-cigarette questions are only about use in the past 30 days. 100% of students who reported e-cigarette use also reported lifetime use of a vaporizer (and therefore were asked questions about substances vaped).

Table S2: Distribution of Last Substance Vaped by Demographic Groups, Among Respondents in 10<sup>th</sup> and 8<sup>th</sup> Grade Who Ever Used a Vaporizer (Estimates Are Percentages, Standard Errors in Parentheses)

| Variable        | ----- Sex -----     |                 | ----- Race/Ethnicity ----- |                 |                               | ----- Parental Education -----            |                               |
|-----------------|---------------------|-----------------|----------------------------|-----------------|-------------------------------|-------------------------------------------|-------------------------------|
|                 | Female <sup>a</sup> | Male            | White <sup>a</sup>         | Hispanic        | Non-Hispanic African-American | No Parent Has College Degree <sup>a</sup> | Parent(s) With College Degree |
| <b>Grade 10</b> |                     |                 |                            |                 |                               |                                           |                               |
| Unweighted n    | 729                 | 903             | 974                        | 277             | 105                           | 680                                       | 880                           |
| Just Flavoring  | 65.79<br>(1.98)     | 64.88<br>(2.33) | 63.68<br>(1.77)            | 67.91<br>(3.32) | 66.44<br>(5.63)               | 65.56<br>(2.15)                           | 65.29<br>(2.07)               |
| Nicotine        | 18.55<br>(1.62)     | 20.81<br>(1.82) | 23.66<br>(1.46)            | 16.90<br>(2.71) | 10.46<br>(4.39)               | 19.09<br>(1.68)                           | 20.38<br>(1.57)               |
| Marijuana       | 6.30<br>(1.02)      | 6.95<br>(1.16)  | 5.35<br>(.83)              | 6.26<br>(1.74)  | 7.09<br>(2.85)                | 6.12<br>(.94)                             | 7.57<br>(1.31)                |
| Don't Know      | 8.85<br>(1.42)      | 6.84<br>(.98)   | 6.83<br>(1.10)             | 8.64<br>(1.66)  | 12.12<br>(4.27)               | 8.37<br>(1.37)                            | 6.25<br>(1.06)                |
| Other           | .51<br>(.39)        | .52<br>(.27)    | .49<br>(.33)               | .29<br>(.28)    | 3.89*<br>(2.72)               | .85<br>(.41)                              | .50<br>(.37)                  |

| <b>Grade 8</b> |        |        |           |        |        |        |        |
|----------------|--------|--------|-----------|--------|--------|--------|--------|
| Unweighted n   | 458    | 482    | 434       | 239    | 103    | 446    | 412    |
| Just Flavoring | 61.03* | 70.40  | 68.36     | 62.98  | 57.69  | 63.06  | 69.45  |
|                | (3.49) | (2.50) | (3.06)    | (3.34) | (5.97) | (3.08) | (2.85) |
| Nicotine       | 14.87  | 11.67  | 16.83     | 9.80   | 7.97   | 12.37  | 15.51  |
|                | (2.42) | (1.81) | (2.09)    | (3.09) | (2.42) | (1.89) | (2.31) |
| Marijuana      | 7.38   | 4.31   | 4.14      | 9.15*  | 4.95   | 7.71   | 4.48   |
|                | (1.51) | (1.06) | (1.23)    | (2.31) | (1.84) | (1.54) | (1.21) |
| Don't Know     | 15.60  | 12.28  | 10.46     | 15.05  | 27.88* | 16.32  | 9.83*  |
|                | (2.31) | (1.70) | (1.68)    | (2.76) | (6.18) | (2.35) | (1.81) |
| Other          | 1.12   | 1.33   | .21 (.21) | 3.02*  | 1.51   | .54    | .74    |
|                | (.71)  | (.60)  |           | (1.23) | (1.13) | (.29)  | (.64)  |

<sup>a</sup> Reference group for the statistical tests in this category

\* p<.05 in comparison to reference group

Table S3: Estimates of Tobacco/Nicotine Prevalence in the Past 30 Days

|                                                                       | 12 <sup>th</sup> Grade<br>(n=4011) |
|-----------------------------------------------------------------------|------------------------------------|
| Used an e-cigarette to vape any substance or smoked regular cigarette | 19.45 (.96)                        |
| Used an e-cigarette to vape nicotine or smoked regular cigarette      | 12.32 (.76)                        |
| Smoked regular cigarette                                              | 10.13 (.68)                        |
